# Supplementary material for: Synthesis, structures, and theoretical investigation of three polyoxomolybdate-based compounds: self-assembly, fragment analysis, orbital interaction, and formation mechanism
Source: Royal Society of Chemistry journal article supplement (doi:10.1039/c4ce02545h), 2015-01-01
Supplement: c4ce02545h1.pdf [file c4ce02545h1.pdf]

## Electronic Supplementary Information (ESI)

### Synthesis, structures and theoretical investigation of three polyoxomolybdate-based compounds: self-assembling, fragment analysis, orbital interaction, and formation mechanism

Table S1. Crystallographic Data and Structure Refinement Parameters for Compounds 1–3

|                                                                                                             | 1                                                                                | 2                                                                                   | 3                                                                                   |
|-------------------------------------------------------------------------------------------------------------|----------------------------------------------------------------------------------|-------------------------------------------------------------------------------------|-------------------------------------------------------------------------------------|
| formula                                                                                                     | C <sub>16</sub> H <sub>24</sub> CuMo <sub>4</sub> N <sub>8</sub> O <sub>13</sub> | C <sub>54</sub> H <sub>59</sub> Mo <sub>12</sub> N <sub>27</sub> O <sub>45</sub> Si | C <sub>24</sub> H <sub>28</sub> Mo <sub>12</sub> N <sub>12</sub> O <sub>42</sub> Si |
| <i>F</i> w                                                                                                  | 983.73                                                                           | 2985.65                                                                             | 2335.95                                                                             |
| crystal system                                                                                              | monoclinic                                                                       | monoclinic                                                                          | triclinic                                                                           |
| space group                                                                                                 | <i>P</i> 2 <sub>1</sub> / <i>c</i>                                               | <i>C</i> 2/ <i>m</i>                                                                | <i>P</i> -1                                                                         |
| <i>a</i> (Å)                                                                                                | 13.1126(15)                                                                      | 23.3171(13)                                                                         | 11.6044(4)                                                                          |
| <i>b</i> (Å)                                                                                                | 16.1764(19)                                                                      | 15.7546(9)                                                                          | 13.1169(4)                                                                          |
| <i>c</i> (Å)                                                                                                | 17.1279(15)                                                                      | 12.0657(7)                                                                          | 20.4496(9)                                                                          |
| $\alpha$ (°)                                                                                                | 90                                                                               | 90                                                                                  | 99.347(2)                                                                           |
| $\beta$ (°)                                                                                                 | 123.896(6)                                                                       | 94.9490(10)                                                                         | 93.793(2)                                                                           |
| $\gamma$ (°)                                                                                                | 90                                                                               | 90                                                                                  | 113.837(2)                                                                          |
| <i>V</i> (Å <sup>3</sup> )                                                                                  | 3015.6(6)                                                                        | 4415.8(4)                                                                           | 1258.99(2)                                                                          |
| <i>Z</i>                                                                                                    | 4                                                                                | 2                                                                                   | 2                                                                                   |
| <i>D</i> <sub>c</sub> (g·cm <sup>-3</sup> )                                                                 | 2.167                                                                            | 2.245                                                                               | 2.791                                                                               |
| $\mu$ (mm <sup>-1</sup> )                                                                                   | 2.382                                                                            | 1.765                                                                               | 2.749                                                                               |
| <i>F</i> (000)                                                                                              | 1908                                                                             | 2900                                                                                | 2220                                                                                |
| reflns collected/unique                                                                                     | 15868/4529                                                                       | 16040/5149                                                                          | 53969/14351                                                                         |
| GOF on <i>F</i> <sup>2</sup>                                                                                | 1.003                                                                            | 1.061                                                                               | 1.037                                                                               |
| final <i>R</i> <sub>1</sub> <sup>a</sup> , <i>wR</i> <sub>2</sub> <sup>b</sup> [ <i>I</i> > 2σ( <i>I</i> )] | 0.0573, 0.1219                                                                   | 0.0514, 0.1396                                                                      | 0.0382, 0.0742                                                                      |
| final <i>R</i> <sub>1</sub> <sup>a</sup> , <i>wR</i> <sub>2</sub> <sup>b</sup> (all data)                   | 0.1062, 0.1441                                                                   | 0.0632, 0.1479                                                                      | 0.0599, 0.0825                                                                      |
| $\Delta\rho_{max}/\Delta\rho_{min}$ (e·Å <sup>-3</sup> )                                                    | 2.047/-1.090                                                                     | 1.859/-0.638                                                                        | 1.282/-2.120                                                                        |

<sup>a</sup>  $R_1 = \sum \| |F_o| - |F_c| \| / \sum |F_o|$ . <sup>b</sup>  $wR_2 = \{ \sum [w(F_o^2 - F_c^2)^2] / \sum [w(F_o^2)^2] \}^{1/2}$ .

Table S2. Selected Bond Lengths (Å) and Bond Angles (°) for Compounds 1–3

| 1                  |           |                          |           |                     |           |
|--------------------|-----------|--------------------------|-----------|---------------------|-----------|
| Cu(1)-N(7)         | 2.005(9)  | Mo(1)-O(11)              | 2.492(8)  | Mo(3)-O(10)#1       | 2.359(8)  |
| Cu(1)-N(11)        | 2.007(9)  | Mo(4)-O(13)              | 1.690(8)  | Mo(3)-O(2)          | 2.407(8)  |
| Cu(1)-N(5)         | 2.011(10) | Mo(4)-O(11)              | 1.776(7)  | Mo(2)-O(1)          | 1.689(7)  |
| Cu(1)-N(9)         | 2.024(9)  | Mo(4)-O(10)              | 1.800(8)  | Mo(2)-O(6)          | 1.699(7)  |
| Mo(1)-O(9)         | 1.672(9)  | Mo(4)-O(2)               | 1.802(7)  | Mo(2)-O(3)          | 1.904(7)  |
| Mo(1)-O(12)        | 1.702(8)  | Mo(3)-O(5)               | 1.685(7)  | Mo(2)-O(4)          | 1.917(7)  |
| Mo(1)-O(7)         | 1.883(7)  | Mo(3)-O(8)               | 1.700(8)  | Mo(2)-O(11)         | 2.365(7)  |
| Mo(1)-O(4)         | 1.894(7)  | Mo(3)-O(3)               | 1.900(7)  | Mo(2)-O(10)#1       | 2.398(7)  |
| Mo(1)-O(2)#1       | 2.474(8)  | Mo(3)-O(7)#1             | 1.922(7)  |                     |           |
| N(7)-Cu(1)-N(11)   | 92.3(4)   | O(4)-Mo(1)-O(11)         | 70.4(3)   | O(8)-Mo(3)-O(2)     | 163.6(3)  |
| N(7)-Cu(1)-N(5)    | 176.0(4)  | O(2)#1-Mo(1)-O(11)       | 76.3(2)   | O(3)-Mo(3)-O(2)     | 79.9(3)   |
| N(11)-Cu(1)-N(5)   | 87.7(4)   | O(13)-Mo(4)-O(11)        | 109.1(4)  | O(7)#1-Mo(3)-O(2)   | 71.9(3)   |
| N(7)-Cu(1)-N(9)    | 87.7(4)   | O(13)-Mo(4)-O(10)        | 110.1(4)  | O(10)#1-Mo(3)-O(2)  | 77.5(3)   |
| N(11)-Cu(1)-N(9)   | 175.5(4)  | O(11)-Mo(4)-O(10)        | 109.2(3)  | O(1)-Mo(2)-O(6)     | 105.6(4)  |
| N(5)-Cu(1)-N(9)    | 92.7(4)   | O(13)-Mo(4)-O(2)         | 109.0(4)  | O(1)-Mo(2)-O(3)     | 100.0(3)  |
| O(9)-Mo(1)-O(12)   | 105.8(4)  | O(11)-Mo(4)-O(2)         | 110.0(3)  | O(6)-Mo(2)-O(3)     | 101.0(3)  |
| O(9)-Mo(1)-O(7)    | 100.0(4)  | O(10)-Mo(4)-O(2)         | 109.5(4)  | O(1)-Mo(2)-O(4)     | 102.5(3)  |
| O(12)-Mo(1)-O(7)   | 103.9(4)  | O(5)-Mo(3)-O(8)          | 105.4(4)  | O(6)-Mo(2)-O(4)     | 98.4(3)   |
| O(9)-Mo(1)-O(4)    | 103.5(4)  | O(5)-Mo(3)-O(3)          | 98.0(3)   | O(3)-Mo(2)-O(4)     | 144.9(3)  |
| O(12)-Mo(1)-O(4)   | 100.1(3)  | O(8)-Mo(3)-O(3)          | 103.4(3)  | O(1)-Mo(2)-O(11)    | 88.7(3)   |
| O(7)-Mo(1)-O(4)    | 140.2(3)  | O(5)-Mo(3)-O(7)#1        | 101.7(3)  | O(6)-Mo(2)-O(11)    | 164.8(3)  |
| O(9)-Mo(1)-O(2)#1  | 165.7(4)  | O(8)-Mo(3)-O(7)#1        | 98.5(3)   | O(3)-Mo(2)-O(11)    | 81.0(3)   |
| O(12)-Mo(1)-O(2)#1 | 87.5(3)   | O(3)-Mo(3)-O(7)#1        | 145.3(3)  | O(4)-Mo(2)-O(11)    | 73.0(3)   |
| O(7)-Mo(1)-O(2)#1  | 70.9(3)   | O(5)-Mo(3)-O(10)#1       | 165.2(3)  | O(1)-Mo(2)-O(10)#1  | 162.9(3)  |
| O(4)-Mo(1)-O(2)#1  | 78.9(3)   | O(8)-Mo(3)-O(10)#1       | 88.2(3)   | O(6)-Mo(2)-O(10)#1  | 90.8(3)   |
| O(9)-Mo(1)-O(11)   | 91.1(4)   | O(3)-Mo(3)-O(10)#1       | 72.6(3)   | O(3)-Mo(2)-O(10)#1  | 71.6(3)   |
| O(12)-Mo(1)-O(11)  | 162.4(3)  | O(7)#1-Mo(3)-<br>O(10)#1 | 81.6(3)   | O(4)-Mo(2)-O(10)#1  | 79.2(3)   |
| O(7)-Mo(1)-O(11)   | 77.5(3)   | O(5)-Mo(3)-O(2)          | 89.8(3)   | O(11)-Mo(2)-O(10)#1 | 75.5(3)   |
| 2                  |           |                          |           |                     |           |
| Mo(1)-O(4)         | 1.652(12) | Mo(2)-O(6)               | 2.378(12) | Mo(4)-O(8)#2        | 1.997(11) |
| Mo(1)-O(7)#2       | 1.805(11) | Mo(2)-O(10)              | 2.418(13) | Mo(4)-O(8)          | 1.997(11) |
| Mo(1)-O(7)         | 1.805(11) | Mo(3)-O(1)               | 1.662(9)  | Mo(4)-O(6)#2        | 2.418(12) |
| Mo(1)-O(9)         | 1.984(11) | Mo(3)-O(5)               | 1.793(11) | Mo(4)-O(6)          | 2.418(12) |
| Mo(1)-O(9)#2       | 1.984(11) | Mo(3)-O(11)              | 1.818(10) | Si(1)-O(10)#3       | 1.604(12) |
| Mo(1)-O(10)#2      | 2.393(12) | Mo(3)-O(12)#3            | 1.983(11) | Si(1)-O(10)#4       | 1.604(12) |
| Mo(1)-O(10)        | 2.393(12) | Mo(3)-O(7)               | 2.006(11) | Si(1)-O(10)#2       | 1.604(12) |
| Mo(2)-O(3)         | 1.643(9)  | Mo(3)-O(6)#3             | 2.361(12) | Si(1)-O(10)         | 1.604(12) |
| Mo(2)-O(8)         | 1.785(11) | Mo(3)-O(10)              | 2.410(13) | Si(1)-O(6)#4        | 1.641(12) |

|                          |           |                          |           |                           |           |
|--------------------------|-----------|--------------------------|-----------|---------------------------|-----------|
| Mo(2)-O(9)               | 1.807(11) | Mo(4)-O(2)               | 1.659(13) | Si(1)-O(6)#3              | 1.641(12) |
| Mo(2)-O(11)#3            | 1.996(10) | Mo(4)-O(12)#2            | 1.816(11) | Si(1)-O(6)                | 1.641(12) |
| Mo(2)-O(5)               | 2.021(11) | Mo(4)-O(12)              | 1.816(11) | Si(1)-O(6)#2              | 1.641(12) |
| O(4)-Mo(1)-O(7)#2        | 101.7(5)  | O(9)-Mo(2)-O(10)         | 64.5(5)   | O(8)#2-Mo(4)-O(6)#2       | 62.0(4)   |
| O(4)-Mo(1)-O(7)          | 101.7(5)  | O(11)#3-Mo(2)-O(10)      | 92.1(4)   | O(8)-Mo(4)-O(6)#2         | 92.2(4)   |
| O(7)#2-Mo(1)-O(7)        | 96.4(7)   | O(5)-Mo(2)-O(10)         | 62.6(4)   | O(2)-Mo(4)-O(6)           | 155.7(3)  |
| O(4)-Mo(1)-O(9)          | 99.5(5)   | O(6)-Mo(2)-O(10)         | 46.0(4)   | O(12)#2-Mo(4)-O(6)        | 99.3(5)   |
| O(7)#2-Mo(1)-O(9)        | 156.9(5)  | O(1)-Mo(3)-O(5)          | 101.1(5)  | O(12)-Mo(4)-O(6)          | 63.9(4)   |
| O(7)-Mo(1)-O(9)          | 88.1(5)   | O(1)-Mo(3)-O(11)         | 103.0(5)  | O(8)#2-Mo(4)-O(6)         | 92.2(4)   |
| O(4)-Mo(1)-O(9)#2        | 99.5(5)   | O(5)-Mo(3)-O(11)         | 97.7(5)   | O(8)-Mo(4)-O(6)           | 62.0(4)   |
| O(7)#2-Mo(1)-O(9)#2      | 88.1(5)   | O(1)-Mo(3)-O(12)#3       | 98.6(5)   | O(6)#2-Mo(4)-O(6)         | 47.2(6)   |
| O(7)-Mo(1)-O(9)#2        | 156.9(5)  | O(5)-Mo(3)-O(12)#3       | 157.7(5)  | O(10)#3-Si(1)-<br>O(10)#4 | 68.4(9)   |
| O(9)-Mo(1)-O(9)#2        | 79.5(7)   | O(11)-Mo(3)-O(12)#3      | 87.9(5)   | O(10)#3-Si(1)-<br>O(10)#2 | 180.0(10) |
| O(4)-Mo(1)-O(10)#2       | 157.3(3)  | O(1)-Mo(3)-O(7)          | 97.3(5)   | O(10)#4-Si(1)-<br>O(10)#2 | 111.6(9)  |
| O(7)#2-Mo(1)-<br>O(10)#2 | 65.4(5)   | O(5)-Mo(3)-O(7)          | 87.6(5)   | O(10)#3-Si(1)-O(10)       | 111.6(9)  |
| O(7)-Mo(1)-O(10)#2       | 98.3(5)   | O(11)-Mo(3)-O(7)         | 157.6(5)  | O(10)#4-Si(1)-O(10)       | 180.0(7)  |
| O(9)-Mo(1)-O(10)#2       | 91.6(4)   | O(12)#3-Mo(3)-O(7)       | 79.6(4)   | O(10)#2-Si(1)-O(10)       | 68.4(9)   |
| O(9)#2-Mo(1)-<br>O(10)#2 | 63.0(4)   | O(1)-Mo(3)-O(6)#3        | 156.9(5)  | O(10)#3-Si(1)-O(6)#4      | 109.3(6)  |
| O(4)-Mo(1)-O(10)         | 157.3(3)  | O(5)-Mo(3)-O(6)#3        | 99.8(4)   | O(10)#4-Si(1)-O(6)#4      | 70.6(6)   |
| O(7)#2-Mo(1)-O(10)       | 98.3(5)   | O(11)-Mo(3)-O(6)#3       | 64.5(5)   | O(10)#2-Si(1)-O(6)#4      | 70.7(6)   |
| O(7)-Mo(1)-O(10)         | 65.4(5)   | O(12)#3-Mo(3)-<br>O(6)#3 | 63.1(4)   | O(10)-Si(1)-O(6)#4        | 109.4(6)  |
| O(9)-Mo(1)-O(10)         | 63.0(4)   | O(7)-Mo(3)-O(6)#3        | 93.2(4)   | O(10)#3-Si(1)-O(6)#3      | 70.6(6)   |
| O(9)#2-Mo(1)-O(10)       | 91.6(4)   | O(1)-Mo(3)-O(10)         | 155.1(5)  | O(10)#4-Si(1)-O(6)#3      | 109.3(6)  |
| O(10)#2-Mo(1)-O(10)      | 44.3(6)   | O(5)-Mo(3)-O(10)         | 65.5(5)   | O(10)#2-Si(1)-O(6)#3      | 109.4(6)  |
| O(3)-Mo(2)-O(8)          | 103.7(5)  | O(11)-Mo(3)-O(10)        | 99.8(5)   | O(10)-Si(1)-O(6)#3        | 70.7(6)   |
| O(3)-Mo(2)-O(9)          | 102.7(5)  | O(12)#3-Mo(3)-O(10)      | 92.3(4)   | O(6)#4-Si(1)-O(6)#3       | 72.2(8)   |
| O(8)-Mo(2)-O(9)          | 98.2(5)   | O(7)-Mo(3)-O(10)         | 62.6(4)   | O(10)#3-Si(1)-O(6)        | 70.7(6)   |
| O(3)-Mo(2)-O(11)#3       | 97.7(5)   | O(6)#3-Mo(3)-O(10)       | 46.4(4)   | O(10)#4-Si(1)-O(6)        | 109.4(6)  |
| O(8)-Mo(2)-O(11)#3       | 88.4(5)   | O(2)-Mo(4)-O(12)#2       | 102.5(4)  | O(10)#2-Si(1)-O(6)        | 109.3(6)  |
| O(9)-Mo(2)-O(11)#3       | 156.4(5)  | O(2)-Mo(4)-O(12)         | 102.5(4)  | O(10)-Si(1)-O(6)          | 70.6(6)   |
| O(3)-Mo(2)-O(5)          | 97.3(5)   | O(12)#2-Mo(4)-O(12)      | 97.5(7)   | O(6)#4-Si(1)-O(6)         | 180.0(7)  |
| O(8)-Mo(2)-O(5)          | 156.7(5)  | O(2)-Mo(4)-O(8)#2        | 99.2(4)   | O(6)#3-Si(1)-O(6)         | 107.8(8)  |
| O(9)-Mo(2)-O(5)          | 86.9(5)   | O(12)#2-Mo(4)-<br>O(8)#2 | 87.5(5)   | O(10)#3-Si(1)-O(6)#2      | 109.4(6)  |
| O(11)#3-Mo(2)-O(5)       | 78.7(4)   | O(12)-Mo(4)-O(8)#2       | 156.0(5)  | O(10)#4-Si(1)-O(6)#2      | 70.7(6)   |
| O(3)-Mo(2)-O(6)          | 155.9(5)  | O(2)-Mo(4)-O(8)          | 99.2(4)   | O(10)#2-Si(1)-O(6)#2      | 70.6(6)   |
| O(8)-Mo(2)-O(6)          | 65.3(5)   | O(12)#2-Mo(4)-O(8)       | 156.0(5)  | O(10)-Si(1)-O(6)#2        | 109.3(6)  |

|                    |          |                          |          |                     |          |
|--------------------|----------|--------------------------|----------|---------------------|----------|
| O(9)-Mo(2)-O(6)    | 100.2(5) | O(12)-Mo(4)-O(8)         | 87.5(5)  | O(6)#4-Si(1)-O(6)#2 | 107.8(8) |
| O(11)#3-Mo(2)-O(6) | 62.0(4)  | O(8)#2-Mo(4)-O(8)        | 79.0(6)  | O(6)#3-Si(1)-O(6)#2 | 180.0(9) |
| O(5)-Mo(2)-O(6)    | 91.4(4)  | O(2)-Mo(4)-O(6)#2        | 155.7(3) | O(6)-Si(1)-O(6)#2   | 72.2(8)  |
| O(3)-Mo(2)-O(10)   | 155.5(5) | O(12)#2-Mo(4)-<br>O(6)#2 | 63.9(4)  |                     |          |
| O(8)-Mo(2)-O(10)   | 99.0(5)  | O(12)-Mo(4)-O(6)#2       | 99.3(5)  |                     |          |

### 3

|             |          |             |          |              |          |
|-------------|----------|-------------|----------|--------------|----------|
| Mo(1)-O(15) | 1.677(3) | Mo(5)-O(10) | 1.866(3) | Mo(9)-O(38)  | 1.958(3) |
| Mo(1)-O(3)  | 1.894(3) | Mo(5)-O(23) | 1.972(3) | Mo(9)-O(20)  | 2.361(3) |
| Mo(1)-O(29) | 1.902(3) | Mo(5)-O(18) | 1.991(3) | Mo(10)-O(24) | 1.676(3) |
| Mo(1)-O(9)  | 1.940(3) | Mo(5)-O(1)  | 2.340(3) | Mo(10)-O(18) | 1.832(3) |
| Mo(1)-O(2)  | 1.955(3) | Mo(6)-O(37) | 1.691(3) | Mo(10)-O(27) | 1.930(3) |
| Mo(1)-O(13) | 2.352(3) | Mo(6)-O(2)  | 1.862(3) | Mo(10)-O(16) | 1.954(3) |
| Mo(2)-O(8)  | 1.676(3) | Mo(6)-O(40) | 1.868(3) | Mo(10)-O(28) | 2.000(3) |
| Mo(2)-O(34) | 1.885(3) | Mo(6)-O(10) | 1.961(3) | Mo(10)-O(20) | 2.322(3) |
| Mo(2)-O(23) | 1.899(3) | Mo(6)-O(34) | 1.980(3) | Mo(11)-O(21) | 1.695(3) |
| Mo(2)-O(26) | 1.949(3) | Mo(6)-O(1)  | 2.341(3) | Mo(11)-O(17) | 1.838(3) |
| Mo(2)-O(19) | 1.954(3) | Mo(7)-O(32) | 1.683(3) | Mo(11)-O(36) | 1.883(3) |
| Mo(2)-O(1)  | 2.353(3) | Mo(7)-O(7)  | 1.898(3) | Mo(11)-O(35) | 1.967(3) |
| Mo(3)-O(5)  | 1.677(3) | Mo(7)-O(33) | 1.916(3) | Mo(11)-O(7)  | 1.987(3) |
| Mo(3)-O(25) | 1.852(3) | Mo(7)-O(27) | 1.916(3) | Mo(11)-O(4)  | 2.321(3) |
| Mo(3)-O(22) | 1.869(3) | Mo(7)-O(11) | 1.957(3) | Mo(12)-O(30) | 1.688(3) |
| Mo(3)-O(17) | 1.979(3) | Mo(7)-O(4)  | 2.345(3) | Mo(12)-O(28) | 1.872(3) |
| Mo(3)-O(3)  | 1.997(3) | Mo(8)-O(39) | 1.672(3) | Mo(12)-O(38) | 1.893(3) |
| Mo(3)-O(13) | 2.337(3) | Mo(8)-O(9)  | 1.899(3) | Mo(12)-O(25) | 1.961(3) |
| Mo(4)-O(14) | 1.690(3) | Mo(8)-O(35) | 1.901(3) | Mo(12)-O(36) | 1.963(3) |
| Mo(4)-O(19) | 1.864(3) | Mo(8)-O(33) | 1.936(3) | Mo(12)-O(20) | 2.363(3) |
| Mo(4)-O(6)  | 1.890(3) | Mo(8)-O(40) | 1.959(3) | Si(1)-O(13)  | 1.623(3) |
| Mo(4)-O(29) | 1.948(3) | Mo(8)-O(4)  | 2.363(3) | Si(1)-O(1)   | 1.627(3) |
| Mo(4)-O(22) | 1.976(3) | Mo(9)-O(31) | 1.680(3) | Si(1)-O(20)  | 1.628(3) |
| Mo(4)-O(13) | 2.348(3) | Mo(9)-O(26) | 1.878(3) | Si(1)-O(4)   | 1.630(3) |
| Mo(5)-O(12) | 1.675(3) | Mo(9)-O(6)  | 1.928(3) |              |          |
| Mo(5)-O(11) | 1.861(3) | Mo(9)-O(16) | 1.933(3) |              |          |

|                   |                 |                   |                 |                   |                 |
|-------------------|-----------------|-------------------|-----------------|-------------------|-----------------|
| O(15)-Mo(1)-O(3)  | 101.83(14)<br>) | O(11)-Mo(5)-O(10) | 94.99(13)       | O(26)-Mo(9)-O(16) | 90.47(13)       |
| O(15)-Mo(1)-O(29) | 100.57(14)<br>) | O(12)-Mo(5)-O(23) | 98.91(14)       | O(6)-Mo(9)-O(16)  | 158.72(12)<br>) |
| O(3)-Mo(1)-O(29)  | 91.12(13)       | O(11)-Mo(5)-O(23) | 156.90(12)<br>) | O(31)-Mo(9)-O(38) | 100.26(16)<br>) |
| O(15)-Mo(1)-O(9)  | 100.13(14)<br>) | O(10)-Mo(5)-O(23) | 89.15(13)       | O(26)-Mo(9)-O(38) | 157.77(13)<br>) |
| O(3)-Mo(1)-O(9)   | 89.02(12)       | O(12)-Mo(5)-O(18) | 99.37(14)       | O(6)-Mo(9)-O(38)  | 87.77(13)       |
| O(29)-Mo(1)-O(9)  | 158.81(12)      | O(11)-Mo(5)-O(18) | 84.59(13)       | O(16)-Mo(9)-O(38) | 86.92(13)       |

|                   |            |                   |            |                    |            |
|-------------------|------------|-------------------|------------|--------------------|------------|
| O(15)-Mo(1)-O(2)  | 99.28(14)  | O(10)-Mo(5)-O(18) | 158.93(12) | O(31)-Mo(9)-O(20)  | 170.67(14) |
| O(3)-Mo(1)-O(2)   | 158.62(12) | O(23)-Mo(5)-O(18) | 83.51(13)  | O(26)-Mo(9)-O(20)  | 84.63(11)  |
| O(29)-Mo(1)-O(2)  | 88.31(13)  | O(12)-Mo(5)-O(1)  | 171.48(12) | O(6)-Mo(9)-O(20)   | 84.86(11)  |
| O(9)-Mo(1)-O(2)   | 83.96(12)  | O(11)-Mo(5)-O(1)  | 85.64(11)  | O(16)-Mo(9)-O(20)  | 73.87(11)  |
| O(15)-Mo(1)-O(13) | 173.72(13) | O(10)-Mo(5)-O(1)  | 75.29(11)  | O(38)-Mo(9)-O(20)  | 73.43(12)  |
| O(3)-Mo(1)-O(13)  | 74.87(11)  | O(23)-Mo(5)-O(1)  | 73.43(11)  | O(24)-Mo(10)-O(18) | 104.43(15) |
| O(29)-Mo(1)-O(13) | 74.35(11)  | O(18)-Mo(5)-O(1)  | 83.68(11)  | O(24)-Mo(10)-O(27) | 101.18(14) |
| O(9)-Mo(1)-O(13)  | 85.26(11)  | O(37)-Mo(6)-O(2)  | 102.22(15) | O(18)-Mo(10)-O(27) | 88.63(13)  |
| O(2)-Mo(1)-O(13)  | 84.42(11)  | O(37)-Mo(6)-O(40) | 103.46(16) | O(24)-Mo(10)-O(16) | 97.68(14)  |
| O(8)-Mo(2)-O(34)  | 100.85(16) | O(2)-Mo(6)-O(40)  | 89.52(13)  | O(18)-Mo(10)-O(16) | 91.88(13)  |
| O(8)-Mo(2)-O(23)  | 99.96(15)  | O(37)-Mo(6)-O(10) | 98.78(15)  | O(27)-Mo(10)-O(16) | 160.39(12) |
| O(34)-Mo(2)-O(23) | 91.32(13)  | O(2)-Mo(6)-O(10)  | 158.67(13) | O(24)-Mo(10)-O(28) | 96.62(15)  |
| O(8)-Mo(2)-O(26)  | 100.02(16) | O(40)-Mo(6)-O(10) | 89.17(13)  | O(18)-Mo(10)-O(28) | 158.91(13) |
| O(34)-Mo(2)-O(26) | 158.82(13) | O(37)-Mo(6)-O(34) | 97.67(16)  | O(27)-Mo(10)-O(28) | 86.13(13)  |
| O(23)-Mo(2)-O(26) | 88.58(13)  | O(2)-Mo(6)-O(34)  | 88.45(13)  | O(16)-Mo(10)-O(28) | 86.40(13)  |
| O(8)-Mo(2)-O(19)  | 101.16(15) | O(40)-Mo(6)-O(34) | 158.71(13) | O(24)-Mo(10)-O(20) | 167.14(14) |
| O(34)-Mo(2)-O(19) | 89.33(13)  | O(10)-Mo(6)-O(34) | 85.11(12)  | O(18)-Mo(10)-O(20) | 86.22(12)  |
| O(23)-Mo(2)-O(19) | 158.36(12) | O(37)-Mo(6)-O(1)  | 168.37(14) | O(27)-Mo(10)-O(20) | 86.04(11)  |
| O(26)-Mo(2)-O(19) | 83.15(13)  | O(2)-Mo(6)-O(1)   | 85.02(12)  | O(16)-Mo(10)-O(20) | 74.44(11)  |
| O(8)-Mo(2)-O(1)   | 172.38(14) | O(40)-Mo(6)-O(1)  | 85.51(12)  | O(28)-Mo(10)-O(20) | 73.05(11)  |
| O(34)-Mo(2)-O(1)  | 74.53(11)  | O(10)-Mo(6)-O(1)  | 73.66(11)  | O(21)-Mo(11)-O(17) | 101.90(14) |
| O(23)-Mo(2)-O(1)  | 74.36(11)  | O(34)-Mo(6)-O(1)  | 73.21(11)  | O(21)-Mo(11)-O(36) | 102.08(16) |
| O(26)-Mo(2)-O(1)  | 85.08(11)  | O(32)-Mo(7)-O(7)  | 101.19(14) | O(17)-Mo(11)-O(36) | 89.29(13)  |
| O(19)-Mo(2)-O(1)  | 85.00(11)  | O(32)-Mo(7)-O(33) | 100.72(15) | O(21)-Mo(11)-O(35) | 97.47(15)  |

|                   |            |                   |            |                    |            |
|-------------------|------------|-------------------|------------|--------------------|------------|
|                   |            |                   | )          |                    |            |
| O(5)-Mo(3)-O(25)  | 103.44(15) | O(7)-Mo(7)-O(33)  | 89.83(13)  | O(17)-Mo(11)-O(35) | 90.53(13)  |
|                   | )          |                   |            |                    |            |
| O(5)-Mo(3)-O(22)  | 101.16(14) | O(32)-Mo(7)-O(27) | 99.62(15)  | O(36)-Mo(11)-O(35) | 160.06(13) |
|                   | )          |                   |            |                    | )          |
| O(25)-Mo(3)-O(22) | 95.04(13)  | O(7)-Mo(7)-O(27)  | 91.17(13)  | O(21)-Mo(11)-O(7)  | 97.99(14)  |
| O(5)-Mo(3)-O(17)  | 99.35(14)  | O(33)-Mo(7)-O(27) | 159.04(12) | O(17)-Mo(11)-O(7)  | 160.03(12) |
|                   |            |                   | )          |                    | )          |
| O(25)-Mo(3)-O(17) | 86.08(12)  | O(32)-Mo(7)-O(11) | 100.74(14) | O(36)-Mo(11)-O(7)  | 88.31(12)  |
|                   |            |                   | )          |                    |            |
| O(22)-Mo(3)-O(17) | 158.59(13) | O(7)-Mo(7)-O(11)  | 158.05(12) | O(35)-Mo(11)-O(7)  | 85.09(13)  |
|                   | )          |                   | )          |                    |            |
| O(5)-Mo(3)-O(3)   | 97.31(14)  | O(33)-Mo(7)-O(11) | 87.08(13)  | O(21)-Mo(11)-O(4)  | 168.56(13) |
|                   |            |                   |            |                    | )          |
| O(25)-Mo(3)-O(3)  | 157.88(13) | O(27)-Mo(7)-O(11) | 84.20(13)  | O(17)-Mo(11)-O(4)  | 86.29(11)  |
|                   | )          |                   |            |                    |            |
| O(22)-Mo(3)-O(3)  | 88.33(13)  | O(32)-Mo(7)-O(4)  | 173.47(13) | O(36)-Mo(11)-O(4)  | 85.83(12)  |
|                   |            |                   | )          |                    |            |
| O(17)-Mo(3)-O(3)  | 83.03(12)  | O(7)-Mo(7)-O(4)   | 74.71(11)  | O(35)-Mo(11)-O(4)  | 74.26(11)  |
| O(5)-Mo(3)-O(13)  | 170.03(13) | O(33)-Mo(7)-O(4)  | 74.43(11)  | O(7)-Mo(11)-O(4)   | 73.76(10)  |
|                   | )          |                   |            |                    |            |
| O(25)-Mo(3)-O(13) | 86.22(12)  | O(27)-Mo(7)-O(4)  | 85.65(11)  | O(30)-Mo(12)-O(28) | 101.18(16) |
|                   |            |                   |            |                    | )          |
| O(22)-Mo(3)-O(13) | 75.16(11)  | O(11)-Mo(7)-O(4)  | 83.54(11)  | O(30)-Mo(12)-O(38) | 100.99(17) |
|                   |            |                   |            |                    | )          |
| O(17)-Mo(3)-O(13) | 83.59(11)  | O(39)-Mo(8)-O(9)  | 102.30(15) | O(28)-Mo(12)-O(38) | 91.00(14)  |
|                   |            |                   | )          |                    |            |
| O(3)-Mo(3)-O(13)  | 73.49(11)  | O(39)-Mo(8)-O(35) | 100.36(16) | O(30)-Mo(12)-O(25) | 100.89(15) |
|                   |            |                   | )          |                    | )          |
| O(14)-Mo(4)-O(19) | 102.60(14) | O(9)-Mo(8)-O(35)  | 90.95(13)  | O(28)-Mo(12)-O(25) | 157.52(13) |
|                   | )          |                   |            |                    | )          |
| O(14)-Mo(4)-O(6)  | 102.46(14) | O(39)-Mo(8)-O(33) | 99.68(15)  | O(38)-Mo(12)-O(25) | 88.91(13)  |
|                   | )          |                   |            |                    |            |
| O(19)-Mo(4)-O(6)  | 88.80(13)  | O(9)-Mo(8)-O(33)  | 157.72(13) | O(30)-Mo(12)-O(36) | 100.28(17) |
|                   |            |                   | )          |                    | )          |
| O(14)-Mo(4)-O(29) | 99.06(14)  | O(35)-Mo(8)-O(33) | 88.66(13)  | O(28)-Mo(12)-O(36) | 89.62(13)  |
| O(19)-Mo(4)-O(29) | 90.20(13)  | O(39)-Mo(8)-O(40) | 100.13(16) | O(38)-Mo(12)-O(36) | 158.18(13) |
|                   |            |                   | )          |                    | )          |
| O(6)-Mo(4)-O(29)  | 158.15(12) | O(9)-Mo(8)-O(40)  | 84.57(13)  | O(25)-Mo(12)-O(36) | 82.34(12)  |
|                   | )          |                   |            |                    |            |
| O(14)-Mo(4)-O(22) | 97.93(13)  | O(35)-Mo(8)-O(40) | 159.50(13) | O(30)-Mo(12)-O(20) | 173.29(14) |
|                   |            |                   | )          |                    | )          |
| O(19)-Mo(4)-O(22) | 159.42(12) | O(33)-Mo(8)-O(40) | 88.04(13)  | O(28)-Mo(12)-O(20) | 74.23(11)  |
|                   | )          |                   |            |                    |            |

|                   |            |                   |            |                    |            |
|-------------------|------------|-------------------|------------|--------------------|------------|
| O(6)-Mo(4)-O(22)  | 88.26(13)  | O(39)-Mo(8)-O(4)  | 171.39(13) | O(38)-Mo(12)-O(20) | 74.47(12)  |
| O(29)-Mo(4)-O(22) | 85.05(13)  | O(9)-Mo(8)-O(4)   | 84.77(11)  | O(25)-Mo(12)-O(20) | 84.12(11)  |
| O(14)-Mo(4)-O(13) | 168.65(12) | O(35)-Mo(8)-O(4)  | 74.38(11)  | O(36)-Mo(12)-O(20) | 84.73(11)  |
| O(19)-Mo(4)-O(13) | 86.37(11)  | O(33)-Mo(8)-O(4)  | 73.67(11)  | O(13)-Si(1)-O(1)   | 108.99(15) |
| O(6)-Mo(4)-O(13)  | 84.48(11)  | O(40)-Mo(8)-O(4)  | 85.29(11)  | O(13)-Si(1)-O(20)  | 109.43(15) |
| O(29)-Mo(4)-O(13) | 73.67(10)  | O(31)-Mo(9)-O(26) | 101.94(16) | O(1)-Si(1)-O(20)   | 109.70(15) |
| O(22)-Mo(4)-O(13) | 73.07(10)  | O(31)-Mo(9)-O(6)  | 101.98(15) | O(13)-Si(1)-O(4)   | 109.85(14) |
| O(12)-Mo(5)-O(11) | 102.52(14) | O(26)-Mo(9)-O(6)  | 86.71(13)  | O(1)-Si(1)-O(4)    | 109.60(15) |
| O(12)-Mo(5)-O(10) | 101.26(15) | O(31)-Mo(9)-O(16) | 99.24(15)  | O(20)-Si(1)-O(4)   | 109.26(15) |

---

<sup>a</sup> Symmetry transformations used to generate equivalent atoms. For **1**: #1, 1 - x, -y + 1, 1 - z; For **2**: #1, x, -y, z; #2, x, -y + 1, z; #3, -x + 1, y, -z + 1; #4, -x + 1, -y + 1, -z + 1; #5, x, -y + 2, z.

Table S3 The hydrogen bonding linkages in **2** and **3**

| D-H...A           | H...A     | D...A     | D-H...A   |
|-------------------|-----------|-----------|-----------|
| <b>2</b>          |           |           |           |
| O2W- H2W2... N1   | 2.012(17) | 2.750(15) | 144.8(16) |
| O2W- H2W1... O7   | 2.179(12) | 3.009(11) | 165.3(11) |
| N4- H4A... N3     | 1.85      | 2.69(2)   | 165.2     |
| N1- H1A... O2W    | 1.91      | 2.750(15) | 164.7     |
| N22- H22... O11   | 1.78      | 2.629(12) | 167.3     |
| N22'- H22'... O3  | 2.22      | 2.879(10) | 133.3     |
| N22'- H22'... O11 | 1.97      | 2.724(12) | 144.9     |
|                   |           |           |           |
| <b>3</b>          |           |           |           |
| O2W- H2W1... O28  | 2.05(5)   | 2.813(6)  | 148(8)    |
| O1W- H1W2... O2   | 2.19(5)   | 2.963(6)  | 151(8)    |
| N12- H12... O21   | 2.04      | 2.849(5)  | 156.2     |
| N10- H10... O1W   | 1.84      | 2.699(7)  | 174.6     |
| N9- H9A... O7     | 1.99      | 2.799(5)  | 157.4     |
| N7- H7A... O17    | 2.65      | 3.085(5)  | 112.3     |
| N7- H7A... O9     | 2.56      | 3.112(5)  | 122.6     |
| N7- H7A... O3     | 2.02      | 2.866(5)  | 166.5     |
| N6- H6A... O23    | 1.94      | 2.784(6)  | 167.9     |
| N4- H4... O2W     | 1.84      | 2.672(7)  | 162.6     |
| N3- H3... O16     | 1.93      | 2.724(5)  | 152.6     |
| N1- H1... O27     | 2.62      | 3.217(5)  | 127.5     |
| N1- H1... O32     | 2.55      | 3.270(5)  | 142       |
| N1- H1... O14     | 2.25      | 2.856(5)  | 127.1     |
